# Supplementary material
Source: publisher site journal article supplement (https://www.spandidos-publications.com/3038/downloadSupplementary)
Supplement: Supplementary file 1 [file downloadSupplementary]

## Sheet: hsa_circRNA_101566
Table SI. The information of the differentially expressed circRNAs and the miRNAs interacting with the circRNAs
SeqName	GeneSymbol	GeneType	Competing endogenous (Ce)Names	CeSymbols	CeTypes	Pvalues	Rank	CommonMirnasNum	SeqMirnasNum	SeqMirnaCoverage	CeMirnasNum	CeMirnaCoverage	AllMirnasNum	CommonMirnas
hsa_circRNA_101566	hsa_circ_0035957	circRNA	NM_025184	EFHC2	protein_coding	6.97415e-09	457	11	32	0.34375	96	0.114583	2588	hsa-miR-187-5p,hsa-miR-518d-5p,hsa-miR-526a,hsa-miR-520c-5p,hsa-miR-518f-5p,hsa-miR-519b-5p,hsa-miR-523-5p,hsa-miR-518e-5p,hsa-miR-519c-5p,hsa-miR-522-5p,hsa-miR-519a-5p
hsa_circRNA_101566	hsa_circ_0035957	circRNA	NM_001059	TACR3	protein_coding	5.13886e-14	45	10	32	0.3125	25	0.4	2588	hsa-miR-518d-5p,hsa-miR-526a,hsa-miR-520c-5p,hsa-miR-518f-5p,hsa-miR-519b-5p,hsa-miR-523-5p,hsa-miR-518e-5p,hsa-miR-519c-5p,hsa-miR-522-5p,hsa-miR-519a-5p
hsa_circRNA_101566	hsa_circ_0035957	circRNA	NM_001535	PRMT2	protein_coding	5.99991e-08	709	10	32	0.3125	91	0.10989	2588	hsa-miR-518d-5p,hsa-miR-526a,hsa-miR-520c-5p,hsa-miR-518f-5p,hsa-miR-519b-5p,hsa-miR-523-5p,hsa-miR-518e-5p,hsa-miR-519c-5p,hsa-miR-522-5p,hsa-miR-519a-5p
hsa_circRNA_101566	hsa_circ_0035957	circRNA	NM_018318	CCDC91	protein_coding	4.31574e-08	666	10	32	0.3125	88	0.113636	2588	hsa-miR-518d-5p,hsa-miR-526a,hsa-miR-520c-5p,hsa-miR-518f-5p,hsa-miR-519b-5p,hsa-miR-523-5p,hsa-miR-518e-5p,hsa-miR-519c-5p,hsa-miR-522-5p,hsa-miR-519a-5p
hsa_circRNA_101566	hsa_circ_0035957	circRNA	NM_024096	DCTPP1	protein_coding	2.0892e-09	352	11	32	0.34375	86	0.127907	2588	hsa-miR-518d-5p,hsa-miR-526a,hsa-miR-520c-5p,hsa-miR-518f-5p,hsa-miR-519b-5p,hsa-miR-523-5p,hsa-miR-518e-5p,hsa-miR-519c-5p,hsa-miR-522-5p,hsa-miR-519a-5p,hsa-miR-573
hsa_circRNA_101566	hsa_circ_0035957	circRNA	NM_002772	TMPRSS15	protein_coding	4.3762e-09	409	10	32	0.3125	70	0.142857	2588	hsa-miR-518d-5p,hsa-miR-526a,hsa-miR-520c-5p,hsa-miR-518f-5p,hsa-miR-519b-5p,hsa-miR-523-5p,hsa-miR-518e-5p,hsa-miR-519c-5p,hsa-miR-522-5p,hsa-miR-519a-5p
hsa_circRNA_101566	hsa_circ_0035957	circRNA	NM_001242885	LOC100287036	protein_coding	6.67815e-08	727	10	32	0.3125	92	0.108696	2588	hsa-miR-518d-5p,hsa-miR-526a,hsa-miR-520c-5p,hsa-miR-518f-5p,hsa-miR-519b-5p,hsa-miR-523-5p,hsa-miR-518e-5p,hsa-miR-519c-5p,hsa-miR-522-5p,hsa-miR-519a-5p
hsa_circRNA_101566	hsa_circ_0035957	circRNA	NM_018478	DBNDD2	protein_coding	8.24102e-08	757	10	32	0.3125	94	0.106383	2588	hsa-miR-518d-5p,hsa-miR-526a,hsa-miR-520c-5p,hsa-miR-518f-5p,hsa-miR-519b-5p,hsa-miR-523-5p,hsa-miR-518e-5p,hsa-miR-519c-5p,hsa-miR-522-5p,hsa-miR-519a-5p
hsa_circRNA_101566	hsa_circ_0035957	circRNA	NM_020649	CBX8	protein_coding	2.01196e-10	224	10	32	0.3125	52	0.192308	2588	hsa-miR-518d-5p,hsa-miR-526a,hsa-miR-520c-5p,hsa-miR-518f-5p,hsa-miR-519b-5p,hsa-miR-523-5p,hsa-miR-518e-5p,hsa-miR-519c-5p,hsa-miR-522-5p,hsa-miR-519a-5p
hsa_circRNA_101566	hsa_circ_0035957	circRNA	NM_014014	SNRNP200	protein_coding	1.07583e-09	318	11	32	0.34375	81	0.135802	2588	hsa-miR-518d-5p,hsa-miR-526a,hsa-miR-520c-5p,hsa-miR-518f-5p,hsa-miR-519b-5p,hsa-miR-523-5p,hsa-miR-518e-5p,hsa-miR-519c-5p,hsa-miR-522-5p,hsa-miR-519a-5p,hsa-miR-147a
hsa_circRNA_101566	hsa_circ_0035957	circRNA	NM_001099293	KIF4B	protein_coding	5.38332e-08	702	10	32	0.3125	90	0.111111	2588	hsa-miR-518d-5p,hsa-miR-526a,hsa-miR-520c-5p,hsa-miR-518f-5p,hsa-miR-519b-5p,hsa-miR-523-5p,hsa-miR-518e-5p,hsa-miR-519c-5p,hsa-miR-522-5p,hsa-miR-519a-5p
hsa_circRNA_101566	hsa_circ_0035957	circRNA	NM_004119	FLT3	protein_coding	3.88928e-09	400	11	32	0.34375	91	0.120879	2588	hsa-miR-542-3p,hsa-miR-518d-5p,hsa-miR-526a,hsa-miR-520c-5p,hsa-miR-518f-5p,hsa-miR-519b-5p,hsa-miR-523-5p,hsa-miR-518e-5p,hsa-miR-519c-5p,hsa-miR-522-5p,hsa-miR-519a-5p
hsa_circRNA_101566	hsa_circ_0035957	circRNA	NM_001029881	CIB4	protein_coding	2.01524e-13	54	10	32	0.3125	28	0.357143	2588	hsa-miR-518d-5p,hsa-miR-526a,hsa-miR-520c-5p,hsa-miR-518f-5p,hsa-miR-519b-5p,hsa-miR-523-5p,hsa-miR-518e-5p,hsa-miR-519c-5p,hsa-miR-522-5p,hsa-miR-519a-5p
hsa_circRNA_101566	hsa_circ_0035957	circRNA	NM_003477	PDHX	protein_coding	1.01187e-07	787	10	32	0.3125	96	0.104167	2588	hsa-miR-518d-5p,hsa-miR-526a,hsa-miR-520c-5p,hsa-miR-518f-5p,hsa-miR-519b-5p,hsa-miR-523-5p,hsa-miR-518e-5p,hsa-miR-519c-5p,hsa-miR-522-5p,hsa-miR-519a-5p
hsa_circRNA_101566	hsa_circ_0035957	circRNA	NM_001033	RRM1	protein_coding	1.55473e-11	141	10	32	0.3125	41	0.243902	2588	hsa-miR-518d-5p,hsa-miR-526a,hsa-miR-520c-5p,hsa-miR-518f-5p,hsa-miR-519b-5p,hsa-miR-523-5p,hsa-miR-518e-5p,hsa-miR-519c-5p,hsa-miR-522-5p,hsa-miR-519a-5p
hsa_circRNA_101566	hsa_circ_0035957	circRNA	NM_003655	CBX4	protein_coding	1.67775e-08	573	10	32	0.3125	80	0.125	2588	hsa-miR-518d-5p,hsa-miR-526a,hsa-miR-520c-5p,hsa-miR-518f-5p,hsa-miR-519b-5p,hsa-miR-523-5p,hsa-miR-518e-5p,hsa-miR-519c-5p,hsa-miR-522-5p,hsa-miR-519a-5p
hsa_circRNA_101566	hsa_circ_0035957	circRNA	NM_001136043	VWA9	protein_coding	1.06884e-10	194	11	32	0.34375	66	0.166667	2588	hsa-miR-141-5p,hsa-miR-518d-5p,hsa-miR-526a,hsa-miR-520c-5p,hsa-miR-518f-5p,hsa-miR-519b-5p,hsa-miR-523-5p,hsa-miR-518e-5p,hsa-miR-519c-5p,hsa-miR-522-5p,hsa-miR-519a-5p
hsa_circRNA_101566	hsa_circ_0035957	circRNA	NM_006269	RP1	protein_coding	6.84992e-11	172	10	32	0.3125	47	0.212766	2588	hsa-miR-518d-5p,hsa-miR-526a,hsa-miR-520c-5p,hsa-miR-518f-5p,hsa-miR-519b-5p,hsa-miR-523-5p,hsa-miR-518e-5p,hsa-miR-519c-5p,hsa-miR-522-5p,hsa-miR-519a-5p
hsa_circRNA_101566	hsa_circ_0035957	circRNA	NM_079420	MYL1	protein_coding	1.06032e-13	52	11	32	0.34375	37	0.297297	2588	hsa-miR-518d-5p,hsa-miR-526a,hsa-miR-520c-5p,hsa-miR-518f-5p,hsa-miR-519b-5p,hsa-miR-523-5p,hsa-miR-518e-5p,hsa-miR-519c-5p,hsa-miR-522-5p,hsa-miR-519a-5p,hsa-miR-147a
hsa_circRNA_101566	hsa_circ_0035957	circRNA	NM_006159	NELL2	protein_coding	2.40232e-09	363	10	32	0.3125	66	0.151515	2588	hsa-miR-518d-5p,hsa-miR-526a,hsa-miR-520c-5p,hsa-miR-518f-5p,hsa-miR-519b-5p,hsa-miR-523-5p,hsa-miR-518e-5p,hsa-miR-519c-5p,hsa-miR-522-5p,hsa-miR-519a-5p
hsa_circRNA_101566	hsa_circ_0035957	circRNA	NM_016304	RSL24D1	protein_coding	5.99991e-08	710	10	32	0.3125	91	0.10989	2588	hsa-miR-518d-5p,hsa-miR-526a,hsa-miR-520c-5p,hsa-miR-518f-5p,hsa-miR-519b-5p,hsa-miR-523-5p,hsa-miR-518e-5p,hsa-miR-519c-5p,hsa-miR-522-5p,hsa-miR-519a-5p
hsa_circRNA_101566	hsa_circ_0035957	circRNA	NM_021796	PLAC1	protein_coding	6.84992e-11	174	10	32	0.3125	47	0.212766	2588	hsa-miR-518d-5p,hsa-miR-526a,hsa-miR-520c-5p,hsa-miR-518f-5p,hsa-miR-519b-5p,hsa-miR-523-5p,hsa-miR-518e-5p,hsa-miR-519c-5p,hsa-miR-522-5p,hsa-miR-519a-5p
hsa_circRNA_101566	hsa_circ_0035957	circRNA	NM_000596	IGFBP1	protein_coding	6.32928e-10	290	10	32	0.3125	58	0.172414	2588	hsa-miR-518d-5p,hsa-miR-526a,hsa-miR-520c-5p,hsa-miR-518f-5p,hsa-miR-519b-5p,hsa-miR-523-5p,hsa-miR-518e-5p,hsa-miR-519c-5p,hsa-miR-522-5p,hsa-miR-519a-5p
hsa_circRNA_101566	hsa_circ_0035957	circRNA	NM_031480	RIOK1	protein_coding	6.11329e-10	288	11	32	0.34375	77	0.142857	2588	hsa-miR-141-5p,hsa-miR-518d-5p,hsa-miR-526a,hsa-miR-520c-5p,hsa-miR-518f-5p,hsa-miR-519b-5p,hsa-miR-523-5p,hsa-miR-518e-5p,hsa-miR-519c-5p,hsa-miR-522-5p,hsa-miR-519a-5p
hsa_circRNA_101566	hsa_circ_0035957	circRNA	NM_004965	HMGN1	protein_coding	1.00404e-08	507	10	32	0.3125	76	0.131579	2588	hsa-miR-518d-5p,hsa-miR-526a,hsa-miR-520c-5p,hsa-miR-518f-5p,hsa-miR-519b-5p,hsa-miR-523-5p,hsa-miR-518e-5p,hsa-miR-519c-5p,hsa-miR-522-5p,hsa-miR-519a-5p
hsa_circRNA_101566	hsa_circ_0035957	circRNA	NM_003425	ZNF45	protein_coding	3.25862e-09	383	10	32	0.3125	68	0.147059	2588	hsa-miR-518d-5p,hsa-miR-526a,hsa-miR-520c-5p,hsa-miR-518f-5p,hsa-miR-519b-5p,hsa-miR-523-5p,hsa-miR-518e-5p,hsa-miR-519c-5p,hsa-miR-522-5p,hsa-miR-519a-5p
hsa_circRNA_101566	hsa_circ_0035957	circRNA	NM_001304533	NKAIN3	protein_coding	5.33099e-09	435	12	32	0.375	119	0.10084	2588	hsa-miR-655-3p,hsa-miR-369-3p,hsa-miR-518d-5p,hsa-miR-526a,hsa-miR-520c-5p,hsa-miR-518f-5p,hsa-miR-519b-5p,hsa-miR-523-5p,hsa-miR-518e-5p,hsa-miR-519c-5p,hsa-miR-522-5p,hsa-miR-519a-5p
hsa_circRNA_101566	hsa_circ_0035957	circRNA	NM_001025265	CXorf65	protein_coding	1.522e-15	21	10	32	0.3125	19	0.526316	2588	hsa-miR-518d-5p,hsa-miR-526a,hsa-miR-520c-5p,hsa-miR-518f-5p,hsa-miR-519b-5p,hsa-miR-523-5p,hsa-miR-518e-5p,hsa-miR-519c-5p,hsa-miR-522-5p,hsa-miR-519a-5p
hsa_circRNA_101566	hsa_circ_0035957	circRNA	NM_015158	KANK1	protein_coding	2.61411e-09	368	12	32	0.375	112	0.107143	2588	hsa-miR-617,hsa-miR-655-3p,hsa-miR-518d-5p,hsa-miR-526a,hsa-miR-520c-5p,hsa-miR-518f-5p,hsa-miR-519b-5p,hsa-miR-523-5p,hsa-miR-518e-5p,hsa-miR-519c-5p,hsa-miR-522-5p,hsa-miR-519a-5p
hsa_circRNA_101566	hsa_circ_0035957	circRNA	NM_001204871	URGCP-MRPS24	protein_coding	1.29468e-11	136	11	32	0.34375	55	0.2	2588	hsa-miR-518d-5p,hsa-miR-526a,hsa-miR-520c-5p,hsa-miR-518f-5p,hsa-miR-519b-5p,hsa-miR-523-5p,hsa-miR-518e-5p,hsa-miR-519c-5p,hsa-miR-522-5p,hsa-miR-519a-5p,hsa-miR-147a
hsa_circRNA_101566	hsa_circ_0035957	circRNA	NM_144625	WDR64	protein_coding	1.36446e-07	831	10	32	0.3125	99	0.10101	2588	hsa-miR-518d-5p,hsa-miR-526a,hsa-miR-520c-5p,hsa-miR-518f-5p,hsa-miR-519b-5p,hsa-miR-523-5p,hsa-miR-518e-5p,hsa-miR-519c-5p,hsa-miR-522-5p,hsa-miR-519a-5p
hsa_circRNA_101566	hsa_circ_0035957	circRNA	NM_001145115	PPP1R3G	protein_coding	5.2802e-10	280	11	32	0.34375	76	0.144737	2588	hsa-miR-187-5p,hsa-miR-518d-5p,hsa-miR-526a,hsa-miR-520c-5p,hsa-miR-518f-5p,hsa-miR-519b-5p,hsa-miR-523-5p,hsa-miR-518e-5p,hsa-miR-519c-5p,hsa-miR-522-5p,hsa-miR-519a-5p
hsa_circRNA_101566	hsa_circ_0035957	circRNA	NM_016506	KBTBD4	protein_coding	4.797e-11	165	13	32	0.40625	102	0.127451	2588	hsa-miR-146a-3p,hsa-miR-518d-5p,hsa-miR-526a,hsa-miR-520c-5p,hsa-miR-518f-5p,hsa-miR-365b-5p,hsa-miR-519b-5p,hsa-miR-523-5p,hsa-miR-518e-5p,hsa-miR-519c-5p,hsa-miR-522-5p,hsa-miR-519a-5p,hsa-miR-365a-5p
hsa_circRNA_101566	hsa_circ_0035957	circRNA	NM_005348	HSP90AA1	protein_coding	1.65846e-08	569	11	32	0.34375	104	0.105769	2588	hsa-miR-141-5p,hsa-miR-518d-5p,hsa-miR-526a,hsa-miR-520c-5p,hsa-miR-518f-5p,hsa-miR-519b-5p,hsa-miR-523-5p,hsa-miR-518e-5p,hsa-miR-519c-5p,hsa-miR-522-5p,hsa-miR-519a-5p
hsa_circRNA_101566	hsa_circ_0035957	circRNA	NM_001100396	C2orf73	protein_coding	9.74079e-09	504	11	32	0.34375	99	0.111111	2588	hsa-miR-518d-5p,hsa-miR-526a,hsa-miR-520c-5p,hsa-miR-518f-5p,hsa-miR-519b-5p,hsa-miR-523-5p,hsa-miR-518e-5p,hsa-miR-519c-5p,hsa-miR-522-5p,hsa-miR-519a-5p,hsa-miR-573
hsa_circRNA_101566	hsa_circ_0035957	circRNA	NM_133497	KCNV2	protein_coding	1.54553e-12	91	11	32	0.34375	46	0.23913	2588	hsa-miR-187-5p,hsa-miR-518d-5p,hsa-miR-526a,hsa-miR-520c-5p,hsa-miR-518f-5p,hsa-miR-519b-5p,hsa-miR-523-5p,hsa-miR-518e-5p,hsa-miR-519c-5p,hsa-miR-522-5p,hsa-miR-519a-5p
hsa_circRNA_101566	hsa_circ_0035957	circRNA	NM_001782	CD72	protein_coding	3.63282e-10	255	10	32	0.3125	55	0.181818	2588	hsa-miR-518d-5p,hsa-miR-526a,hsa-miR-520c-5p,hsa-miR-518f-5p,hsa-miR-519b-5p,hsa-miR-523-5p,hsa-miR-518e-5p,hsa-miR-519c-5p,hsa-miR-522-5p,hsa-miR-519a-5p
hsa_circRNA_101566	hsa_circ_0035957	circRNA	NM_001643	APOA2	protein_coding	1.82695e-14	39	10	32	0.3125	23	0.434783	2588	hsa-miR-518d-5p,hsa-miR-526a,hsa-miR-520c-5p,hsa-miR-518f-5p,hsa-miR-519b-5p,hsa-miR-523-5p,hsa-miR-518e-5p,hsa-miR-519c-5p,hsa-miR-522-5p,hsa-miR-519a-5p
hsa_circRNA_101566	hsa_circ_0035957	circRNA	NM_015910	WDPCP	protein_coding	7.67764e-09	471	10	32	0.3125	74	0.135135	2588	hsa-miR-518d-5p,hsa-miR-526a,hsa-miR-520c-5p,hsa-miR-518f-5p,hsa-miR-519b-5p,hsa-miR-523-5p,hsa-miR-518e-5p,hsa-miR-519c-5p,hsa-miR-522-5p,hsa-miR-519a-5p
hsa_circRNA_101566	hsa_circ_0035957	circRNA	NM_004923	MTL5	protein_coding	1.8383e-08	584	11	32	0.34375	105	0.104762	2588	hsa-miR-518d-5p,hsa-miR-526a,hsa-miR-520c-5p,hsa-miR-518f-5p,hsa-miR-874-5p,hsa-miR-519b-5p,hsa-miR-523-5p,hsa-miR-518e-5p,hsa-miR-519c-5p,hsa-miR-522-5p,hsa-miR-519a-5p
hsa_circRNA_101566	hsa_circ_0035957	circRNA	NM_020903	USP29	protein_coding	5.27954e-10	276	10	32	0.3125	57	0.175439	2588	hsa-miR-518d-5p,hsa-miR-526a,hsa-miR-520c-5p,hsa-miR-518f-5p,hsa-miR-519b-5p,hsa-miR-523-5p,hsa-miR-518e-5p,hsa-miR-519c-5p,hsa-miR-522-5p,hsa-miR-519a-5p
hsa_circRNA_101566	hsa_circ_0035957	circRNA	NM_004882	CIR1	protein_coding	4.54214e-13	65	10	32	0.3125	30	0.333333	2588	hsa-miR-518d-5p,hsa-miR-526a,hsa-miR-520c-5p,hsa-miR-518f-5p,hsa-miR-519b-5p,hsa-miR-523-5p,hsa-miR-518e-5p,hsa-miR-519c-5p,hsa-miR-522-5p,hsa-miR-519a-5p
hsa_circRNA_101566	hsa_circ_0035957	circRNA	NM_001769	CD9	protein_coding	2.01196e-10	226	10	32	0.3125	52	0.192308	2588	hsa-miR-518d-5p,hsa-miR-526a,hsa-miR-520c-5p,hsa-miR-518f-5p,hsa-miR-519b-5p,hsa-miR-523-5p,hsa-miR-518e-5p,hsa-miR-519c-5p,hsa-miR-522-5p,hsa-miR-519a-5p
hsa_circRNA_101566	hsa_circ_0035957	circRNA	NM_022120	OXCT2	protein_coding	4.54214e-13	66	10	32	0.3125	30	0.333333	2588	hsa-miR-518d-5p,hsa-miR-526a,hsa-miR-520c-5p,hsa-miR-518f-5p,hsa-miR-519b-5p,hsa-miR-523-5p,hsa-miR-518e-5p,hsa-miR-519c-5p,hsa-miR-522-5p,hsa-miR-519a-5p
hsa_circRNA_101566	hsa_circ_0035957	circRNA	NM_000772	CYP2C18	protein_coding	1.65846e-08	570	11	32	0.34375	104	0.105769	2588	hsa-miR-518d-5p,hsa-miR-526a,hsa-miR-520c-5p,hsa-miR-518f-5p,hsa-miR-519b-5p,hsa-miR-523-5p,hsa-miR-518e-5p,hsa-miR-519c-5p,hsa-miR-522-5p,hsa-miR-519a-5p,hsa-miR-877-3p
hsa_circRNA_101566	hsa_circ_0035957	circRNA	NM_001136508	C1orf185	protein_coding	9.60119e-13	74	10	32	0.3125	32	0.3125	2588	hsa-miR-518d-5p,hsa-miR-526a,hsa-miR-520c-5p,hsa-miR-518f-5p,hsa-miR-519b-5p,hsa-miR-523-5p,hsa-miR-518e-5p,hsa-miR-519c-5p,hsa-miR-522-5p,hsa-miR-519a-5p
hsa_circRNA_101566	hsa_circ_0035957	circRNA	NM_003264	TLR2	protein_coding	3.66889e-10	258	12	32	0.375	95	0.126316	2588	hsa-miR-542-3p,hsa-miR-518d-5p,hsa-miR-526a,hsa-miR-520c-5p,hsa-miR-518f-5p,hsa-miR-365b-5p,hsa-miR-519b-5p,hsa-miR-523-5p,hsa-miR-518e-5p,hsa-miR-519c-5p,hsa-miR-522-5p,hsa-miR-519a-5p
hsa_circRNA_101566	hsa_circ_0035957	circRNA	ENST00000420664	AC106873.4	protein_coding	0.000421467	2439	4	32	0.125	30	0.133333	2588	hsa-miR-518d-5p,hsa-miR-526a,hsa-miR-520c-5p,hsa-miR-518f-5p
hsa_circRNA_101566	hsa_circ_0035957	circRNA	NM_014058	TMPRSS11E	protein_coding	7.80589e-09	476	11	32	0.34375	97	0.113402	2588	hsa-miR-518d-5p,hsa-miR-526a,hsa-miR-520c-5p,hsa-miR-518f-5p,hsa-miR-519b-5p,hsa-miR-523-5p,hsa-miR-518e-5p,hsa-miR-519c-5p,hsa-miR-522-5p,hsa-miR-519a-5p,hsa-miR-573
hsa_circRNA_101566	hsa_circ_0035957	circRNA	NM_021023	CFHR3	protein_coding	2.43688e-13	56	12	32	0.375	53	0.226415	2588	hsa-miR-510-3p,hsa-miR-187-5p,hsa-miR-518d-5p,hsa-miR-526a,hsa-miR-520c-5p,hsa-miR-518f-5p,hsa-miR-519b-5p,hsa-miR-523-5p,hsa-miR-518e-5p,hsa-miR-519c-5p,hsa-miR-522-5p,hsa-miR-519a-5p
hsa_circRNA_101566	hsa_circ_0035957	circRNA	NM_173605	KCNRG	protein_coding	3.78087e-09	398	10	32	0.3125	69	0.144928	2588	hsa-miR-518d-5p,hsa-miR-526a,hsa-miR-520c-5p,hsa-miR-518f-5p,hsa-miR-519b-5p,hsa-miR-523-5p,hsa-miR-518e-5p,hsa-miR-519c-5p,hsa-miR-522-5p,hsa-miR-519a-5p
hsa_circRNA_101566	hsa_circ_0035957	circRNA	NM_199051	BRINP3	protein_coding	9.60119e-13	75	10	32	0.3125	32	0.3125	2588	hsa-miR-518d-5p,hsa-miR-526a,hsa-miR-520c-5p,hsa-miR-518f-5p,hsa-miR-519b-5p,hsa-miR-523-5p,hsa-miR-518e-5p,hsa-miR-519c-5p,hsa-miR-522-5p,hsa-miR-519a-5p
hsa_circRNA_101566	hsa_circ_0035957	circRNA	NM_152638	CCER1	protein_coding	5.38332e-08	703	10	32	0.3125	90	0.111111	2588	hsa-miR-518d-5p,hsa-miR-526a,hsa-miR-520c-5p,hsa-miR-518f-5p,hsa-miR-519b-5p,hsa-miR-523-5p,hsa-miR-518e-5p,hsa-miR-519c-5p,hsa-miR-522-5p,hsa-miR-519a-5p
hsa_circRNA_101566	hsa_circ_0035957	circRNA	NM_001164458	ACTR3C	protein_coding	2.46039e-10	236	10	32	0.3125	53	0.188679	2588	hsa-miR-518d-5p,hsa-miR-526a,hsa-miR-520c-5p,hsa-miR-518f-5p,hsa-miR-519b-5p,hsa-miR-523-5p,hsa-miR-518e-5p,hsa-miR-519c-5p,hsa-miR-522-5p,hsa-miR-519a-5p
hsa_circRNA_101566	hsa_circ_0035957	circRNA	NM_002441	MSH5	protein_coding	1.04073e-14	34	10	32	0.3125	22	0.454545	2588	hsa-miR-518d-5p,hsa-miR-526a,hsa-miR-520c-5p,hsa-miR-518f-5p,hsa-miR-519b-5p,hsa-miR-523-5p,hsa-miR-518e-5p,hsa-miR-519c-5p,hsa-miR-522-5p,hsa-miR-519a-5p
hsa_circRNA_101566	hsa_circ_0035957	circRNA	NM_080869	WFDC12	protein_coding	1.504e-07	848	10	32	0.3125	100	0.1	2588	hsa-miR-518d-5p,hsa-miR-526a,hsa-miR-520c-5p,hsa-miR-518f-5p,hsa-miR-519b-5p,hsa-miR-523-5p,hsa-miR-518e-5p,hsa-miR-519c-5p,hsa-miR-522-5p,hsa-miR-519a-5p
hsa_circRNA_101566	hsa_circ_0035957	circRNA	NM_006234	POLR2J	protein_coding	5.05341e-09	431	10	32	0.3125	71	0.140845	2588	hsa-miR-518d-5p,hsa-miR-526a,hsa-miR-520c-5p,hsa-miR-518f-5p,hsa-miR-519b-5p,hsa-miR-523-5p,hsa-miR-518e-5p,hsa-miR-519c-5p,hsa-miR-522-5p,hsa-miR-519a-5p
hsa_circRNA_101566	hsa_circ_0035957	circRNA	NM_002614	PDZK1	protein_coding	5.27954e-10	277	10	32	0.3125	57	0.175439	2588	hsa-miR-518d-5p,hsa-miR-526a,hsa-miR-520c-5p,hsa-miR-518f-5p,hsa-miR-519b-5p,hsa-miR-523-5p,hsa-miR-518e-5p,hsa-miR-519c-5p,hsa-miR-522-5p,hsa-miR-519a-5p
hsa_circRNA_101566	hsa_circ_0035957	circRNA	NM_002438	MRC1	protein_coding	1.00404e-08	509	10	32	0.3125	76	0.131579	2588	hsa-miR-518d-5p,hsa-miR-526a,hsa-miR-520c-5p,hsa-miR-518f-5p,hsa-miR-519b-5p,hsa-miR-523-5p,hsa-miR-518e-5p,hsa-miR-519c-5p,hsa-miR-522-5p,hsa-miR-519a-5p
hsa_circRNA_101566	hsa_circ_0035957	circRNA	NM_024662	NAT10	protein_coding	1.41055e-09	328	11	32	0.34375	83	0.13253	2588	hsa-miR-518d-5p,hsa-miR-526a,hsa-miR-520c-5p,hsa-miR-518f-5p,hsa-miR-519b-5p,hsa-miR-523-5p,hsa-miR-518e-5p,hsa-miR-519c-5p,hsa-miR-522-5p,hsa-miR-519a-5p,hsa-miR-147a
hsa_circRNA_101566	hsa_circ_0035957	circRNA	NM_004585	RARRES3	protein_coding	1.36681e-12	87	10	32	0.3125	33	0.30303	2588	hsa-miR-518d-5p,hsa-miR-526a,hsa-miR-520c-5p,hsa-miR-518f-5p,hsa-miR-519b-5p,hsa-miR-523-5p,hsa-miR-518e-5p,hsa-miR-519c-5p,hsa-miR-522-5p,hsa-miR-519a-5p
hsa_circRNA_101566	hsa_circ_0035957	circRNA	NM_012179	FBXO7	protein_coding	1.32716e-10	205	10	32	0.3125	50	0.2	2588	hsa-miR-518d-5p,hsa-miR-526a,hsa-miR-520c-5p,hsa-miR-518f-5p,hsa-miR-519b-5p,hsa-miR-523-5p,hsa-miR-518e-5p,hsa-miR-519c-5p,hsa-miR-522-5p,hsa-miR-519a-5p
hsa_circRNA_101566	hsa_circ_0035957	circRNA	NM_001704	ADGRB3	protein_coding	1.11921e-07	795	10	32	0.3125	97	0.103093	2588	hsa-miR-518d-5p,hsa-miR-526a,hsa-miR-520c-5p,hsa-miR-518f-5p,hsa-miR-519b-5p,hsa-miR-523-5p,hsa-miR-518e-5p,hsa-miR-519c-5p,hsa-miR-522-5p,hsa-miR-519a-5p
hsa_circRNA_101566	hsa_circ_0035957	circRNA	NM_016941	DLL3	protein_coding	3.56974e-11	154	11	32	0.34375	60	0.183333	2588	hsa-miR-361-3p,hsa-miR-518d-5p,hsa-miR-526a,hsa-miR-520c-5p,hsa-miR-518f-5p,hsa-miR-519b-5p,hsa-miR-523-5p,hsa-miR-518e-5p,hsa-miR-519c-5p,hsa-miR-522-5p,hsa-miR-519a-5p
hsa_circRNA_101566	hsa_circ_0035957	circRNA	NM_001140	ALOX15	protein_coding	4.82921e-09	424	12	32	0.375	118	0.101695	2588	hsa-miR-518d-5p,hsa-miR-526a,hsa-miR-520c-5p,hsa-miR-518f-5p,hsa-miR-365b-5p,hsa-miR-519b-5p,hsa-miR-523-5p,hsa-miR-518e-5p,hsa-miR-519c-5p,hsa-miR-522-5p,hsa-miR-519a-5p,hsa-miR-365a-5p
hsa_circRNA_101566	hsa_circ_0035957	circRNA	NM_003345	UBE2I	protein_coding	8.16702e-10	303	13	32	0.40625	127	0.102362	2588	hsa-miR-187-5p,hsa-miR-361-3p,hsa-miR-518d-5p,hsa-miR-526a,hsa-miR-520c-5p,hsa-miR-518f-5p,hsa-miR-519b-5p,hsa-miR-523-5p,hsa-miR-518e-5p,hsa-miR-519c-5p,hsa-miR-522-5p,hsa-miR-519a-5p,hsa-miR-10a-5p
hsa_circRNA_101566	hsa_circ_0035957	circRNA	NM_032333	FAM213A	protein_coding	1.00404e-08	510	10	32	0.3125	76	0.131579	2588	hsa-miR-518d-5p,hsa-miR-526a,hsa-miR-520c-5p,hsa-miR-518f-5p,hsa-miR-519b-5p,hsa-miR-523-5p,hsa-miR-518e-5p,hsa-miR-519c-5p,hsa-miR-522-5p,hsa-miR-519a-5p
hsa_circRNA_101566	hsa_circ_0035957	circRNA	NM_001109938	C6orf136	protein_coding	5.43509e-11	169	10	32	0.3125	46	0.217391	2588	hsa-miR-518d-5p,hsa-miR-526a,hsa-miR-520c-5p,hsa-miR-518f-5p,hsa-miR-519b-5p,hsa-miR-523-5p,hsa-miR-518e-5p,hsa-miR-519c-5p,hsa-miR-522-5p,hsa-miR-519a-5p
hsa_circRNA_101566	hsa_circ_0035957	circRNA	NM_004763	ITGB1BP1	protein_coding	1.00404e-08	512	10	32	0.3125	76	0.131579	2588	hsa-miR-518d-5p,hsa-miR-526a,hsa-miR-520c-5p,hsa-miR-518f-5p,hsa-miR-519b-5p,hsa-miR-523-5p,hsa-miR-518e-5p,hsa-miR-519c-5p,hsa-miR-522-5p,hsa-miR-519a-5p
hsa_circRNA_101566	hsa_circ_0035957	circRNA	NM_018556	SIRPG	protein_coding	1.11921e-07	797	10	32	0.3125	97	0.103093	2588	hsa-miR-518d-5p,hsa-miR-526a,hsa-miR-520c-5p,hsa-miR-518f-5p,hsa-miR-519b-5p,hsa-miR-523-5p,hsa-miR-518e-5p,hsa-miR-519c-5p,hsa-miR-522-5p,hsa-miR-519a-5p
hsa_circRNA_101566	hsa_circ_0035957	circRNA	NM_032623	MGARP	protein_coding	1.47974e-08	555	10	32	0.3125	79	0.126582	2588	hsa-miR-518d-5p,hsa-miR-526a,hsa-miR-520c-5p,hsa-miR-518f-5p,hsa-miR-519b-5p,hsa-miR-523-5p,hsa-miR-518e-5p,hsa-miR-519c-5p,hsa-miR-522-5p,hsa-miR-519a-5p
hsa_circRNA_101566	hsa_circ_0035957	circRNA	UC010KAK.3	BAI3	protein_coding	1.11921e-07	798	10	32	0.3125	97	0.103093	2588	hsa-miR-518d-5p,hsa-miR-526a,hsa-miR-520c-5p,hsa-miR-518f-5p,hsa-miR-519b-5p,hsa-miR-523-5p,hsa-miR-518e-5p,hsa-miR-519c-5p,hsa-miR-522-5p,hsa-miR-519a-5p
hsa_circRNA_101566	hsa_circ_0035957	circRNA	NM_004280	EEF1E1	protein_coding	2.99585e-10	249	10	32	0.3125	54	0.185185	2588	hsa-miR-518d-5p,hsa-miR-526a,hsa-miR-520c-5p,hsa-miR-518f-5p,hsa-miR-519b-5p,hsa-miR-523-5p,hsa-miR-518e-5p,hsa-miR-519c-5p,hsa-miR-522-5p,hsa-miR-519a-5p
hsa_circRNA_101566	hsa_circ_0035957	circRNA	NM_020195	SDR39U1	protein_coding	6.693e-09	453	10	32	0.3125	73	0.136986	2588	hsa-miR-518d-5p,hsa-miR-526a,hsa-miR-520c-5p,hsa-miR-518f-5p,hsa-miR-519b-5p,hsa-miR-523-5p,hsa-miR-518e-5p,hsa-miR-519c-5p,hsa-miR-522-5p,hsa-miR-519a-5p
hsa_circRNA_101566	hsa_circ_0035957	circRNA	NM_017830	OCIAD1	protein_coding	6.22272e-09	446	11	32	0.34375	95	0.115789	2588	hsa-miR-369-3p,hsa-miR-518d-5p,hsa-miR-526a,hsa-miR-520c-5p,hsa-miR-518f-5p,hsa-miR-519b-5p,hsa-miR-523-5p,hsa-miR-518e-5p,hsa-miR-519c-5p,hsa-miR-522-5p,hsa-miR-519a-5p
hsa_circRNA_101566	hsa_circ_0035957	circRNA	NM_030578	B9D2	protein_coding	6.71213e-12	115	10	32	0.3125	38	0.263158	2588	hsa-miR-518d-5p,hsa-miR-526a,hsa-miR-520c-5p,hsa-miR-518f-5p,hsa-miR-519b-5p,hsa-miR-523-5p,hsa-miR-518e-5p,hsa-miR-519c-5p,hsa-miR-522-5p,hsa-miR-519a-5p
hsa_circRNA_101566	hsa_circ_0035957	circRNA	NM_021785	RAI2	protein_coding	8.95605e-12	123	10	32	0.3125	39	0.25641	2588	hsa-miR-518d-5p,hsa-miR-526a,hsa-miR-520c-5p,hsa-miR-518f-5p,hsa-miR-519b-5p,hsa-miR-523-5p,hsa-miR-518e-5p,hsa-miR-519c-5p,hsa-miR-522-5p,hsa-miR-519a-5p
hsa_circRNA_101566	hsa_circ_0035957	circRNA	ENST00000397891	FAM188B2	protein_coding	5.33099e-09	436	12	32	0.375	119	0.10084	2588	hsa-miR-518d-5p,hsa-miR-526a,hsa-miR-520c-5p,hsa-miR-518f-5p,hsa-miR-365b-5p,hsa-miR-519b-5p,hsa-miR-523-5p,hsa-miR-518e-5p,hsa-miR-519c-5p,hsa-miR-522-5p,hsa-miR-519a-5p,hsa-miR-365a-5p
hsa_circRNA_101566	hsa_circ_0035957	circRNA	NM_001008938	CKAP5	protein_coding	1.06821e-09	315	10	32	0.3125	61	0.163934	2588	hsa-miR-518d-5p,hsa-miR-526a,hsa-miR-520c-5p,hsa-miR-518f-5p,hsa-miR-519b-5p,hsa-miR-523-5p,hsa-miR-518e-5p,hsa-miR-519c-5p,hsa-miR-522-5p,hsa-miR-519a-5p
hsa_circRNA_101566	hsa_circ_0035957	circRNA	NM_022087	GALNT11	protein_coding	1.07583e-09	321	11	32	0.34375	81	0.135802	2588	hsa-miR-494-3p,hsa-miR-518d-5p,hsa-miR-526a,hsa-miR-520c-5p,hsa-miR-518f-5p,hsa-miR-519b-5p,hsa-miR-523-5p,hsa-miR-518e-5p,hsa-miR-519c-5p,hsa-miR-522-5p,hsa-miR-519a-5p
hsa_circRNA_101566	hsa_circ_0035957	circRNA	NM_001080493	ZNF823	protein_coding	1.04364e-11	129	11	32	0.34375	54	0.203704	2588	hsa-miR-510-3p,hsa-miR-518d-5p,hsa-miR-526a,hsa-miR-520c-5p,hsa-miR-518f-5p,hsa-miR-519b-5p,hsa-miR-523-5p,hsa-miR-518e-5p,hsa-miR-519c-5p,hsa-miR-522-5p,hsa-miR-519a-5p
hsa_circRNA_101566	hsa_circ_0035957	circRNA	NM_018088	FAM90A1	protein_coding	4.3762e-09	415	10	32	0.3125	70	0.142857	2588	hsa-miR-518d-5p,hsa-miR-526a,hsa-miR-520c-5p,hsa-miR-518f-5p,hsa-miR-519b-5p,hsa-miR-523-5p,hsa-miR-518e-5p,hsa-miR-519c-5p,hsa-miR-522-5p,hsa-miR-519a-5p
hsa_circRNA_101566	hsa_circ_0035957	circRNA	NM_016486	TMEM69	protein_coding	4.3762e-09	416	10	32	0.3125	70	0.142857	2588	hsa-miR-518d-5p,hsa-miR-526a,hsa-miR-520c-5p,hsa-miR-518f-5p,hsa-miR-519b-5p,hsa-miR-523-5p,hsa-miR-518e-5p,hsa-miR-519c-5p,hsa-miR-522-5p,hsa-miR-519a-5p
hsa_circRNA_101566	hsa_circ_0035957	circRNA	NM_001170779	FAM122C	protein_coding	6.84992e-11	179	10	32	0.3125	47	0.212766	2588	hsa-miR-518d-5p,hsa-miR-526a,hsa-miR-520c-5p,hsa-miR-518f-5p,hsa-miR-519b-5p,hsa-miR-523-5p,hsa-miR-518e-5p,hsa-miR-519c-5p,hsa-miR-522-5p,hsa-miR-519a-5p
hsa_circRNA_101566	hsa_circ_0035957	circRNA	NM_003771	KRT36	protein_coding	0.000277038	2388	4	32	0.125	27	0.148148	2588	hsa-miR-518d-5p,hsa-miR-526a,hsa-miR-520c-5p,hsa-miR-518f-5p
hsa_circRNA_101566	hsa_circ_0035957	circRNA	NM_024505	NOX5	protein_coding	4.55062e-10	268	11	32	0.34375	75	0.146667	2588	hsa-miR-134-3p,hsa-miR-518d-5p,hsa-miR-526a,hsa-miR-520c-5p,hsa-miR-518f-5p,hsa-miR-519b-5p,hsa-miR-523-5p,hsa-miR-518e-5p,hsa-miR-519c-5p,hsa-miR-522-5p,hsa-miR-519a-5p
hsa_circRNA_101566	hsa_circ_0035957	circRNA	ENST00000331429	MRC1L1	protein_coding	1.14478e-08	529	10	32	0.3125	77	0.12987	2588	hsa-miR-518d-5p,hsa-miR-526a,hsa-miR-520c-5p,hsa-miR-518f-5p,hsa-miR-519b-5p,hsa-miR-523-5p,hsa-miR-518e-5p,hsa-miR-519c-5p,hsa-miR-522-5p,hsa-miR-519a-5p
hsa_circRNA_101566	hsa_circ_0035957	circRNA	NM_002421	MMP1	protein_coding	2.87292e-10	246	11	32	0.34375	72	0.152778	2588	hsa-miR-518d-5p,hsa-miR-526a,hsa-miR-520c-5p,hsa-miR-518f-5p,hsa-miR-514a-5p,hsa-miR-519b-5p,hsa-miR-523-5p,hsa-miR-518e-5p,hsa-miR-519c-5p,hsa-miR-522-5p,hsa-miR-519a-5p
hsa_circRNA_101566	hsa_circ_0035957	circRNA	NM_002278	KRT32	protein_coding	2.69161e-09	371	11	32	0.34375	88	0.125	2588	hsa-miR-518d-5p,hsa-miR-526a,hsa-miR-520c-5p,hsa-miR-518f-5p,hsa-miR-519b-5p,hsa-miR-523-5p,hsa-miR-518e-5p,hsa-miR-519c-5p,hsa-miR-522-5p,hsa-miR-519a-5p,hsa-miR-573
hsa_circRNA_101566	hsa_circ_0035957	circRNA	NM_018664	BATF3	protein_coding	3.25862e-09	387	10	32	0.3125	68	0.147059	2588	hsa-miR-518d-5p,hsa-miR-526a,hsa-miR-520c-5p,hsa-miR-518f-5p,hsa-miR-519b-5p,hsa-miR-523-5p,hsa-miR-518e-5p,hsa-miR-519c-5p,hsa-miR-522-5p,hsa-miR-519a-5p
hsa_circRNA_101566	hsa_circ_0035957	circRNA	NM_001242896	DEPDC5	protein_coding	6.67815e-08	730	10	32	0.3125	92	0.108696	2588	hsa-miR-518d-5p,hsa-miR-526a,hsa-miR-520c-5p,hsa-miR-518f-5p,hsa-miR-519b-5p,hsa-miR-523-5p,hsa-miR-518e-5p,hsa-miR-519c-5p,hsa-miR-522-5p,hsa-miR-519a-5p
hsa_circRNA_101566	hsa_circ_0035957	circRNA	NM_024815	NUDT18	protein_coding	8.7888e-09	493	10	32	0.3125	75	0.133333	2588	hsa-miR-518d-5p,hsa-miR-526a,hsa-miR-520c-5p,hsa-miR-518f-5p,hsa-miR-519b-5p,hsa-miR-523-5p,hsa-miR-518e-5p,hsa-miR-519c-5p,hsa-miR-522-5p,hsa-miR-519a-5p
hsa_circRNA_101566	hsa_circ_0035957	circRNA	NM_001083335	ZNF112	protein_coding	5.99991e-08	713	10	32	0.3125	91	0.10989	2588	hsa-miR-518d-5p,hsa-miR-526a,hsa-miR-520c-5p,hsa-miR-518f-5p,hsa-miR-519b-5p,hsa-miR-523-5p,hsa-miR-518e-5p,hsa-miR-519c-5p,hsa-miR-522-5p,hsa-miR-519a-5p
hsa_circRNA_101566	hsa_circ_0035957	circRNA	NM_022115	PRDM15	protein_coding	3.62935e-14	44	11	32	0.34375	34	0.323529	2588	hsa-miR-518d-5p,hsa-miR-526a,hsa-miR-520c-5p,hsa-miR-518f-5p,hsa-miR-514a-5p,hsa-miR-519b-5p,hsa-miR-523-5p,hsa-miR-518e-5p,hsa-miR-519c-5p,hsa-miR-522-5p,hsa-miR-519a-5p
hsa_circRNA_101566	hsa_circ_0035957	circRNA	NM_018359	UFSP2	protein_coding	1.8989e-08	589	10	32	0.3125	81	0.123457	2588	hsa-miR-518d-5p,hsa-miR-526a,hsa-miR-520c-5p,hsa-miR-518f-5p,hsa-miR-519b-5p,hsa-miR-523-5p,hsa-miR-518e-5p,hsa-miR-519c-5p,hsa-miR-522-5p,hsa-miR-519a-5p
hsa_circRNA_101566	hsa_circ_0035957	circRNA	NM_004596	SNRPA	protein_coding	0.000479717	2457	4	32	0.125	31	0.129032	2588	hsa-miR-514a-5p,hsa-miR-874-5p,hsa-miR-365b-5p,hsa-miR-365a-5p
hsa_circRNA_101566	hsa_circ_0035957	circRNA	NM_032256	TMEM117	protein_coding	6.01834e-10	284	13	32	0.40625	124	0.104839	2588	hsa-miR-141-5p,hsa-miR-518d-5p,hsa-miR-526a,hsa-miR-520c-5p,hsa-miR-518f-5p,hsa-miR-365b-5p,hsa-miR-519b-5p,hsa-miR-523-5p,hsa-miR-518e-5p,hsa-miR-519c-5p,hsa-miR-522-5p,hsa-miR-519a-5p,hsa-miR-365a-5p
hsa_circRNA_101566	hsa_circ_0035957	circRNA	NM_001559	IL12RB2	protein_coding	9.96564e-10	310	13	32	0.40625	129	0.100775	2588	hsa-miR-361-3p,hsa-miR-518d-5p,hsa-miR-526a,hsa-miR-520c-5p,hsa-miR-518f-5p,hsa-miR-885-5p,hsa-miR-519b-5p,hsa-miR-523-5p,hsa-miR-518e-5p,hsa-miR-519c-5p,hsa-miR-522-5p,hsa-miR-519a-5p,hsa-miR-147a
hsa_circRNA_101566	hsa_circ_0035957	circRNA	NM_014429	MORC1	protein_coding	1.96631e-11	145	11	32	0.34375	57	0.192982	2588	hsa-miR-141-5p,hsa-miR-518d-5p,hsa-miR-526a,hsa-miR-520c-5p,hsa-miR-518f-5p,hsa-miR-519b-5p,hsa-miR-523-5p,hsa-miR-518e-5p,hsa-miR-519c-5p,hsa-miR-522-5p,hsa-miR-519a-5p
hsa_circRNA_101566	hsa_circ_0035957	circRNA	NM_001002923	IGFL4	protein_coding	8.28559e-14	50	10	32	0.3125	26	0.384615	2588	hsa-miR-518d-5p,hsa-miR-526a,hsa-miR-520c-5p,hsa-miR-518f-5p,hsa-miR-519b-5p,hsa-miR-523-5p,hsa-miR-518e-5p,hsa-miR-519c-5p,hsa-miR-522-5p,hsa-miR-519a-5p
hsa_circRNA_101566	hsa_circ_0035957	circRNA	NM_018975	TERF2IP	protein_coding	1.9076e-10	222	12	32	0.375	90	0.133333	2588	hsa-miR-141-5p,hsa-miR-187-5p,hsa-miR-518d-5p,hsa-miR-526a,hsa-miR-520c-5p,hsa-miR-518f-5p,hsa-miR-519b-5p,hsa-miR-523-5p,hsa-miR-518e-5p,hsa-miR-519c-5p,hsa-miR-522-5p,hsa-miR-519a-5p
hsa_circRNA_101566	hsa_circ_0035957	circRNA	NM_006904	PRKDC	protein_coding	1.8383e-08	585	11	32	0.34375	105	0.104762	2588	hsa-miR-141-5p,hsa-miR-518d-5p,hsa-miR-526a,hsa-miR-520c-5p,hsa-miR-518f-5p,hsa-miR-519b-5p,hsa-miR-523-5p,hsa-miR-518e-5p,hsa-miR-519c-5p,hsa-miR-522-5p,hsa-miR-519a-5p
hsa_circRNA_101566	hsa_circ_0035957	circRNA	NM_006163	NFE2	protein_coding	5.21442e-11	168	11	32	0.34375	62	0.177419	2588	hsa-miR-518d-5p,hsa-miR-526a,hsa-miR-520c-5p,hsa-miR-518f-5p,hsa-miR-519b-5p,hsa-miR-523-5p,hsa-miR-518e-5p,hsa-miR-519c-5p,hsa-miR-522-5p,hsa-miR-519a-5p,hsa-miR-877-3p
hsa_circRNA_101566	hsa_circ_0035957	circRNA	NM_020307	CCNL1	protein_coding	2.05452e-09	350	10	32	0.3125	65	0.153846	2588	hsa-miR-518d-5p,hsa-miR-526a,hsa-miR-520c-5p,hsa-miR-518f-5p,hsa-miR-519b-5p,hsa-miR-523-5p,hsa-miR-518e-5p,hsa-miR-519c-5p,hsa-miR-522-5p,hsa-miR-519a-5p
hsa_circRNA_101566	hsa_circ_0035957	circRNA	NM_003853	IL18RAP	protein_coding	1.32716e-10	208	10	32	0.3125	50	0.2	2588	hsa-miR-518d-5p,hsa-miR-526a,hsa-miR-520c-5p,hsa-miR-518f-5p,hsa-miR-519b-5p,hsa-miR-523-5p,hsa-miR-518e-5p,hsa-miR-519c-5p,hsa-miR-522-5p,hsa-miR-519a-5p
hsa_circRNA_101566	hsa_circ_0035957	circRNA	NM_018445	VIMP	protein_coding	5.82213e-09	442	10	32	0.3125	72	0.138889	2588	hsa-miR-518d-5p,hsa-miR-526a,hsa-miR-520c-5p,hsa-miR-518f-5p,hsa-miR-519b-5p,hsa-miR-523-5p,hsa-miR-518e-5p,hsa-miR-519c-5p,hsa-miR-522-5p,hsa-miR-519a-5p
hsa_circRNA_101566	hsa_circ_0035957	circRNA	NM_001146016	TJAP1	protein_coding	7.80589e-09	478	11	32	0.34375	97	0.113402	2588	hsa-miR-146a-3p,hsa-miR-518d-5p,hsa-miR-526a,hsa-miR-520c-5p,hsa-miR-518f-5p,hsa-miR-519b-5p,hsa-miR-523-5p,hsa-miR-518e-5p,hsa-miR-519c-5p,hsa-miR-522-5p,hsa-miR-519a-5p
hsa_circRNA_101566	hsa_circ_0035957	circRNA	NM_005622	ACSM3	protein_coding	5.72121e-15	32	10	32	0.3125	21	0.47619	2588	hsa-miR-518d-5p,hsa-miR-526a,hsa-miR-520c-5p,hsa-miR-518f-5p,hsa-miR-519b-5p,hsa-miR-523-5p,hsa-miR-518e-5p,hsa-miR-519c-5p,hsa-miR-522-5p,hsa-miR-519a-5p
hsa_circRNA_101566	hsa_circ_0035957	circRNA	NM_019040	ELP4	protein_coding	2.14551e-08	594	10	32	0.3125	82	0.121951	2588	hsa-miR-518d-5p,hsa-miR-526a,hsa-miR-520c-5p,hsa-miR-518f-5p,hsa-miR-519b-5p,hsa-miR-523-5p,hsa-miR-518e-5p,hsa-miR-519c-5p,hsa-miR-522-5p,hsa-miR-519a-5p
hsa_circRNA_101566	hsa_circ_0035957	circRNA	NM_001393	ECM2	protein_coding	4.797e-11	166	13	32	0.40625	102	0.127451	2588	hsa-miR-518d-5p,hsa-miR-526a,hsa-miR-520c-5p,hsa-miR-518f-5p,hsa-miR-365b-5p,hsa-miR-519b-5p,hsa-miR-523-5p,hsa-miR-518e-5p,hsa-miR-519c-5p,hsa-miR-522-5p,hsa-miR-519a-5p,hsa-miR-570-5p,hsa-miR-365a-5p
hsa_circRNA_101566	hsa_circ_0035957	circRNA	NM_005208	CRYBA1	protein_coding	1.35064e-16	15	10	32	0.3125	16	0.625	2588	hsa-miR-518d-5p,hsa-miR-526a,hsa-miR-520c-5p,hsa-miR-518f-5p,hsa-miR-519b-5p,hsa-miR-523-5p,hsa-miR-518e-5p,hsa-miR-519c-5p,hsa-miR-522-5p,hsa-miR-519a-5p
hsa_circRNA_101566	hsa_circ_0035957	circRNA	NM_016095	GINS2	protein_coding	6.67815e-08	732	10	32	0.3125	92	0.108696	2588	hsa-miR-518d-5p,hsa-miR-526a,hsa-miR-520c-5p,hsa-miR-518f-5p,hsa-miR-519b-5p,hsa-miR-523-5p,hsa-miR-518e-5p,hsa-miR-519c-5p,hsa-miR-522-5p,hsa-miR-519a-5p
hsa_circRNA_101566	hsa_circ_0035957	circRNA	NM_199289	NEK5	protein_coding	4.21535e-11	157	13	32	0.40625	101	0.128713	2588	hsa-miR-146a-3p,hsa-miR-518d-5p,hsa-miR-526a,hsa-miR-520c-5p,hsa-miR-518f-5p,hsa-miR-519b-5p,hsa-miR-523-5p,hsa-miR-518e-5p,hsa-miR-519c-5p,hsa-miR-522-5p,hsa-miR-519a-5p,hsa-miR-570-5p,hsa-miR-10a-5p
hsa_circRNA_101566	hsa_circ_0035957	circRNA	NM_024508	ZBED2	protein_coding	3.44552e-09	392	11	32	0.34375	90	0.122222	2588	hsa-miR-510-3p,hsa-miR-518d-5p,hsa-miR-526a,hsa-miR-520c-5p,hsa-miR-518f-5p,hsa-miR-519b-5p,hsa-miR-523-5p,hsa-miR-518e-5p,hsa-miR-519c-5p,hsa-miR-522-5p,hsa-miR-519a-5p
hsa_circRNA_101566	hsa_circ_0035957	circRNA	NM_003933	BAIAP3	protein_coding	1.49453e-08	565	11	32	0.34375	103	0.106796	2588	hsa-miR-134-3p,hsa-miR-518d-5p,hsa-miR-526a,hsa-miR-520c-5p,hsa-miR-518f-5p,hsa-miR-519b-5p,hsa-miR-523-5p,hsa-miR-518e-5p,hsa-miR-519c-5p,hsa-miR-522-5p,hsa-miR-519a-5p
hsa_circRNA_101566	hsa_circ_0035957	circRNA	NM_032233	SETD3	protein_coding	4.82921e-09	425	12	32	0.375	118	0.101695	2588	hsa-miR-518d-5p,hsa-miR-526a,hsa-miR-520c-5p,hsa-miR-518f-5p,hsa-miR-885-5p,hsa-miR-519b-5p,hsa-miR-523-5p,hsa-miR-518e-5p,hsa-miR-519c-5p,hsa-miR-522-5p,hsa-miR-519a-5p,hsa-miR-877-3p
hsa_circRNA_101566	hsa_circ_0035957	circRNA	NM_001029860	FBXO43	protein_coding	1.1848e-11	132	10	32	0.3125	40	0.25	2588	hsa-miR-518d-5p,hsa-miR-526a,hsa-miR-520c-5p,hsa-miR-518f-5p,hsa-miR-519b-5p,hsa-miR-523-5p,hsa-miR-518e-5p,hsa-miR-519c-5p,hsa-miR-522-5p,hsa-miR-519a-5p
hsa_circRNA_101566	hsa_circ_0035957	circRNA	NM_005426	TP53BP2	protein_coding	4.38364e-09	421	11	32	0.34375	92	0.119565	2588	hsa-miR-187-5p,hsa-miR-518d-5p,hsa-miR-526a,hsa-miR-520c-5p,hsa-miR-518f-5p,hsa-miR-519b-5p,hsa-miR-523-5p,hsa-miR-518e-5p,hsa-miR-519c-5p,hsa-miR-522-5p,hsa-miR-519a-5p
hsa_circRNA_101566	hsa_circ_0035957	circRNA	NM_001002913	PTRH1	protein_coding	4.54214e-13	68	10	32	0.3125	30	0.333333	2588	hsa-miR-518d-5p,hsa-miR-526a,hsa-miR-520c-5p,hsa-miR-518f-5p,hsa-miR-519b-5p,hsa-miR-523-5p,hsa-miR-518e-5p,hsa-miR-519c-5p,hsa-miR-522-5p,hsa-miR-519a-5p
hsa_circRNA_101566	hsa_circ_0035957	circRNA	NM_004297	GNA14	protein_coding	2.0892e-09	357	11	32	0.34375	86	0.127907	2588	hsa-miR-141-5p,hsa-miR-518d-5p,hsa-miR-526a,hsa-miR-520c-5p,hsa-miR-518f-5p,hsa-miR-519b-5p,hsa-miR-523-5p,hsa-miR-518e-5p,hsa-miR-519c-5p,hsa-miR-522-5p,hsa-miR-519a-5p
hsa_circRNA_101566	hsa_circ_0035957	circRNA	NM_006067	EMC8	protein_coding	2.28506e-10	233	13	32	0.40625	115	0.113043	2588	hsa-miR-187-5p,hsa-miR-518d-5p,hsa-miR-526a,hsa-miR-520c-5p,hsa-miR-518f-5p,hsa-miR-519b-5p,hsa-miR-523-5p,hsa-miR-518e-5p,hsa-miR-519c-5p,hsa-miR-522-5p,hsa-miR-519a-5p,hsa-miR-570-5p,hsa-miR-877-3p
hsa_circRNA_101566	hsa_circ_0035957	circRNA	NM_001195637	CCDC179	protein_coding	5.05341e-09	432	10	32	0.3125	71	0.140845	2588	hsa-miR-518d-5p,hsa-miR-526a,hsa-miR-520c-5p,hsa-miR-518f-5p,hsa-miR-519b-5p,hsa-miR-523-5p,hsa-miR-518e-5p,hsa-miR-519c-5p,hsa-miR-522-5p,hsa-miR-519a-5p
hsa_circRNA_101566	hsa_circ_0035957	circRNA	NM_019071	ING3	protein_coding	9.13734e-08	776	10	32	0.3125	95	0.105263	2588	hsa-miR-518d-5p,hsa-miR-526a,hsa-miR-520c-5p,hsa-miR-518f-5p,hsa-miR-519b-5p,hsa-miR-523-5p,hsa-miR-518e-5p,hsa-miR-519c-5p,hsa-miR-522-5p,hsa-miR-519a-5p
hsa_circRNA_101566	hsa_circ_0035957	circRNA	NM_201546	CDCP2	protein_coding	5.38332e-08	704	10	32	0.3125	90	0.111111	2588	hsa-miR-518d-5p,hsa-miR-526a,hsa-miR-520c-5p,hsa-miR-518f-5p,hsa-miR-519b-5p,hsa-miR-523-5p,hsa-miR-518e-5p,hsa-miR-519c-5p,hsa-miR-522-5p,hsa-miR-519a-5p
hsa_circRNA_101566	hsa_circ_0035957	circRNA	NM_019005	MIOS	protein_coding	2.57827e-12	99	11	32	0.34375	48	0.229167	2588	hsa-miR-518d-5p,hsa-miR-526a,hsa-miR-520c-5p,hsa-miR-518f-5p,hsa-miR-885-5p,hsa-miR-519b-5p,hsa-miR-523-5p,hsa-miR-518e-5p,hsa-miR-519c-5p,hsa-miR-522-5p,hsa-miR-519a-5p
hsa_circRNA_101566	hsa_circ_0035957	circRNA	NM_003002	SDHD	protein_coding	1.36446e-07	835	10	32	0.3125	99	0.10101	2588	hsa-miR-518d-5p,hsa-miR-526a,hsa-miR-520c-5p,hsa-miR-518f-5p,hsa-miR-519b-5p,hsa-miR-523-5p,hsa-miR-518e-5p,hsa-miR-519c-5p,hsa-miR-522-5p,hsa-miR-519a-5p
hsa_circRNA_101566	hsa_circ_0035957	circRNA	NM_144638	TMEM42	protein_coding	1.77384e-10	218	11	32	0.34375	69	0.15942	2588	hsa-miR-518d-5p,hsa-miR-526a,hsa-miR-520c-5p,hsa-miR-518f-5p,hsa-miR-519b-5p,hsa-miR-523-5p,hsa-miR-518e-5p,hsa-miR-519c-5p,hsa-miR-522-5p,hsa-miR-519a-5p,hsa-miR-877-3p
hsa_circRNA_101566	hsa_circ_0035957	circRNA	NM_032315	SLC25A33	protein_coding	3.0519e-13	63	10	32	0.3125	29	0.344828	2588	hsa-miR-518d-5p,hsa-miR-526a,hsa-miR-520c-5p,hsa-miR-518f-5p,hsa-miR-519b-5p,hsa-miR-523-5p,hsa-miR-518e-5p,hsa-miR-519c-5p,hsa-miR-522-5p,hsa-miR-519a-5p
hsa_circRNA_101566	hsa_circ_0035957	circRNA	NM_012242	DKK1	protein_coding	3.43997e-08	648	10	32	0.3125	86	0.116279	2588	hsa-miR-518d-5p,hsa-miR-526a,hsa-miR-520c-5p,hsa-miR-518f-5p,hsa-miR-519b-5p,hsa-miR-523-5p,hsa-miR-518e-5p,hsa-miR-519c-5p,hsa-miR-522-5p,hsa-miR-519a-5p
hsa_circRNA_101566	hsa_circ_0035957	circRNA	NM_020695	REXO1	protein_coding	2.14551e-08	595	10	32	0.3125	82	0.121951	2588	hsa-miR-518d-5p,hsa-miR-526a,hsa-miR-520c-5p,hsa-miR-518f-5p,hsa-miR-519b-5p,hsa-miR-523-5p,hsa-miR-518e-5p,hsa-miR-519c-5p,hsa-miR-522-5p,hsa-miR-519a-5p
hsa_circRNA_101566	hsa_circ_0035957	circRNA	UC003NWY.1	MSH5-SAPCD1	protein_coding	1.65846e-08	572	11	32	0.34375	104	0.105769	2588	hsa-miR-146a-3p,hsa-miR-518d-5p,hsa-miR-526a,hsa-miR-520c-5p,hsa-miR-518f-5p,hsa-miR-519b-5p,hsa-miR-523-5p,hsa-miR-518e-5p,hsa-miR-519c-5p,hsa-miR-522-5p,hsa-miR-519a-5p
hsa_circRNA_101566	hsa_circ_0035957	circRNA	NM_018942	HMX1	protein_coding	2.57827e-12	100	11	32	0.34375	48	0.229167	2588	hsa-miR-134-3p,hsa-miR-518d-5p,hsa-miR-526a,hsa-miR-520c-5p,hsa-miR-518f-5p,hsa-miR-519b-5p,hsa-miR-523-5p,hsa-miR-518e-5p,hsa-miR-519c-5p,hsa-miR-522-5p,hsa-miR-519a-5p
hsa_circRNA_101566	hsa_circ_0035957	circRNA	NM_006507	REG1B	protein_coding	4.98475e-12	110	10	32	0.3125	37	0.27027	2588	hsa-miR-518d-5p,hsa-miR-526a,hsa-miR-520c-5p,hsa-miR-518f-5p,hsa-miR-519b-5p,hsa-miR-523-5p,hsa-miR-518e-5p,hsa-miR-519c-5p,hsa-miR-522-5p,hsa-miR-519a-5p
hsa_circRNA_101566	hsa_circ_0035957	circRNA	NM_001127178	PIGG	protein_coding	3.04771e-09	381	11	32	0.34375	89	0.123596	2588	hsa-miR-518d-5p,hsa-miR-526a,hsa-miR-520c-5p,hsa-miR-518f-5p,hsa-miR-519b-5p,hsa-miR-523-5p,hsa-miR-518e-5p,hsa-miR-519c-5p,hsa-miR-522-5p,hsa-miR-519a-5p,hsa-miR-570-5p
hsa_circRNA_101566	hsa_circ_0035957	circRNA	NM_020531	APMAP	protein_coding	6.67815e-08	734	10	32	0.3125	92	0.108696	2588	hsa-miR-518d-5p,hsa-miR-526a,hsa-miR-520c-5p,hsa-miR-518f-5p,hsa-miR-519b-5p,hsa-miR-523-5p,hsa-miR-518e-5p,hsa-miR-519c-5p,hsa-miR-522-5p,hsa-miR-519a-5p
#

## Sheet: hsa_circRNA_103546
SeqName	GeneSymbol	GeneType	CeNames	CeSymbols	CeTypes	Pvalues	Rank	CommonMirnasNum	SeqMirnasNum	SeqMirnaCoverage	CeMirnasNum	CeMirnaCoverage	AllMirnasNum	CommonMirnas
hsa_circRNA_103546	hsa_circ_0006517	circRNA	NM_178471	GPR119	protein_coding	0.0342954	3999	1	10	0.1	9	0.111111	2588	hsa-miR-765
hsa_circRNA_103546	hsa_circ_0006517	circRNA	NM_001080849	DNLZ	protein_coding	0.0380399	4350	1	10	0.1	10	0.1	2588	hsa-miR-525-5p
hsa_circRNA_103546	hsa_circ_0006517	circRNA	NM_002494	NDUFC1	protein_coding	0.000725728	338	2	10	0.2	11	0.181818	2588	hsa-miR-525-5p,hsa-miR-520a-5p
hsa_circRNA_103546	hsa_circ_0006517	circRNA	NM_001007537	C1QTNF9B	protein_coding	0.000725728	339	2	10	0.2	11	0.181818	2588	hsa-miR-765,hsa-miR-766-5p
hsa_circRNA_103546	hsa_circ_0006517	circRNA	ENST00000556949	RP11-187E13.2	protein_coding	0.0342954	4005	1	10	0.1	9	0.111111	2588	hsa-miR-765
hsa_circRNA_103546	hsa_circ_0006517	circRNA	NM_170699	GPBAR1	protein_coding	0.00246089	775	2	10	0.2	20	0.1	2588	hsa-miR-525-5p,hsa-miR-520a-5p
hsa_circRNA_103546	hsa_circ_0006517	circRNA	NM_005001	NDUFA7	protein_coding	0.00156714	589	2	10	0.2	16	0.125	2588	hsa-miR-765,hsa-miR-766-5p
hsa_circRNA_103546	hsa_circ_0006517	circRNA	NM_002720	PPP4C	protein_coding	5.56488e-06	28	4	10	0.4	35	0.114286	2588	hsa-miR-765,hsa-miR-525-5p,hsa-miR-520a-5p,hsa-miR-766-5p
hsa_circRNA_103546	hsa_circ_0006517	circRNA	NM_002432	MNDA	protein_coding	0.0305378	3732	1	10	0.1	8	0.125	2588	hsa-miR-520a-5p
hsa_circRNA_103546	hsa_circ_0006517	circRNA	NM_017916	PIH1D1	protein_coding	0.0342954	4008	1	10	0.1	9	0.111111	2588	hsa-miR-877-3p
hsa_circRNA_103546	hsa_circ_0006517	circRNA	UC001YSK.1	FLJ00382	protein_coding	0.0115517	2032	1	10	0.1	3	0.333333	2588	hsa-miR-558
hsa_circRNA_103546	hsa_circ_0006517	circRNA	NM_001031834	RAB40AL	protein_coding	0.0267671	3400	1	10	0.1	7	0.142857	2588	hsa-miR-877-3p
hsa_circRNA_103546	hsa_circ_0006517	circRNA	NM_002215	ITIH1	protein_coding	0.0380399	4374	1	10	0.1	10	0.1	2588	hsa-miR-561-5p
hsa_circRNA_103546	hsa_circ_0006517	circRNA	NM_001639	APCS	protein_coding	0.0380399	4375	1	10	0.1	10	0.1	2588	hsa-miR-558
hsa_circRNA_103546	hsa_circ_0006517	circRNA	NM_144673	CMTM2	protein_coding	0.0342954	4015	1	10	0.1	9	0.111111	2588	hsa-miR-520a-5p
hsa_circRNA_103546	hsa_circ_0006517	circRNA	NM_001770	CD19	protein_coding	0.00221938	734	2	10	0.2	19	0.105263	2588	hsa-miR-525-5p,hsa-miR-520a-5p
hsa_circRNA_103546	hsa_circ_0006517	circRNA	NM_001042367	REC114	protein_coding	0.00386399	1035	1	10	0.1	1	1	2588	hsa-miR-766-5p
hsa_circRNA_103546	hsa_circ_0006517	circRNA	ENST00000538162	PNMA6D	protein_coding	0.0305378	3735	1	10	0.1	8	0.125	2588	hsa-miR-765
hsa_circRNA_103546	hsa_circ_0006517	circRNA	NM_001136152	ALG1L2	protein_coding	0.0153755	2417	1	10	0.1	4	0.25	2588	hsa-miR-558
hsa_circRNA_103546	hsa_circ_0006517	circRNA	NM_014260	PFDN6	protein_coding	0.00771453	1560	1	10	0.1	2	0.5	2588	hsa-miR-558
hsa_circRNA_103546	hsa_circ_0006517	circRNA	ENST00000560581	C15orf60	protein_coding	0.00386399	1036	1	10	0.1	1	1	2588	hsa-miR-766-5p
hsa_circRNA_103546	hsa_circ_0006517	circRNA	NM_015895	GMNN	protein_coding	0.00221938	740	2	10	0.2	19	0.105263	2588	hsa-miR-525-5p,hsa-miR-520a-5p
hsa_circRNA_103546	hsa_circ_0006517	circRNA	NM_144962	PEBP4	protein_coding	0.000371758	225	2	10	0.2	8	0.25	2588	hsa-miR-525-5p,hsa-miR-520a-5p
hsa_circRNA_103546	hsa_circ_0006517	circRNA	NM_018139	DNAAF2	protein_coding	0.00198987	690	2	10	0.2	18	0.111111	2588	hsa-miR-525-5p,hsa-miR-520a-5p
hsa_circRNA_103546	hsa_circ_0006517	circRNA	NM_080653	ATP6V1E2	protein_coding	0.0380399	4386	1	10	0.1	10	0.1	2588	hsa-miR-766-5p
hsa_circRNA_103546	hsa_circ_0006517	circRNA	NM_001102564	IFT43	protein_coding	0.0267671	3408	1	10	0.1	7	0.142857	2588	hsa-miR-558
hsa_circRNA_103546	hsa_circ_0006517	circRNA	ENST00000512516	RP11-487E13.1	protein_coding	0.0342954	4027	1	10	0.1	9	0.111111	2588	hsa-miR-766-5p
hsa_circRNA_103546	hsa_circ_0006517	circRNA	NM_004131	GZMB	protein_coding	0.00177243	650	2	10	0.2	17	0.117647	2588	hsa-miR-525-5p,hsa-miR-520a-5p
hsa_circRNA_103546	hsa_circ_0006517	circRNA	NM_001001973	ATP5C1	protein_coding	0.0229831	3076	1	10	0.1	6	0.166667	2588	hsa-miR-766-5p
hsa_circRNA_103546	hsa_circ_0006517	circRNA	NM_002630	PGC	protein_coding	0.00119333	511	2	10	0.2	14	0.142857	2588	hsa-miR-525-5p,hsa-miR-520a-5p
hsa_circRNA_103546	hsa_circ_0006517	circRNA	ENST00000451980	C21orf54	protein_coding	0.00102497	468	2	10	0.2	13	0.153846	2588	hsa-miR-431-5p,hsa-miR-558
hsa_circRNA_103546	hsa_circ_0006517	circRNA	NM_032304	HAGHL	protein_coding	0.00156714	597	2	10	0.2	16	0.125	2588	hsa-miR-525-5p,hsa-miR-520a-5p
hsa_circRNA_103546	hsa_circ_0006517	circRNA	NM_153741	DPM3	protein_coding	0.0305378	3750	1	10	0.1	8	0.125	2588	hsa-miR-766-5p
#

## Sheet: hsa_circRNA_103573
SeqName	GeneSymbol	GeneType	CeNames	CeSymbols	CeTypes	Pvalues	Rank	CommonMirnasNum	SeqMirnasNum	SeqMirnaCoverage	CeMirnasNum	CeMirnaCoverage	AllMirnasNum	CommonMirnas
hsa_circRNA_103573	hsa_circ_0002319	circRNA	UC001YYY.2	SNURF-SNRPN	protein_coding	0.0241183	2489	1	9	0.111111	7	0.142857	2588	hsa-miR-485-5p
hsa_circRNA_103573	hsa_circ_0002319	circRNA	ENST00000341016	CXorf27	protein_coding	0.0241183	2491	1	9	0.111111	7	0.142857	2588	hsa-miR-874-3p
hsa_circRNA_103573	hsa_circ_0002319	circRNA	NM_002291	LAMB1	protein_coding	0.0241183	2492	1	9	0.111111	7	0.142857	2588	hsa-miR-223-3p
hsa_circRNA_103573	hsa_circ_0002319	circRNA	NM_025228	TRAF3IP3	protein_coding	0.0172807	1913	1	9	0.111111	5	0.2	2588	hsa-miR-223-3p
hsa_circRNA_103573	hsa_circ_0002319	circRNA	NM_032816	CEP89	protein_coding	0.000957628	249	2	9	0.222222	14	0.142857	2588	hsa-miR-18a-3p,hsa-miR-874-3p
hsa_circRNA_103573	hsa_circ_0002319	circRNA	NM_021010	DEFA5	protein_coding	0.0275212	2799	1	9	0.111111	8	0.125	2588	hsa-miR-624-3p
hsa_circRNA_103573	hsa_circ_0002319	circRNA	NM_053280	ODF3	protein_coding	0.00159848	346	2	9	0.222222	18	0.111111	2588	hsa-miR-18a-3p,hsa-miR-874-3p
hsa_circRNA_103573	hsa_circ_0002319	circRNA	NM_001002029	C4B	protein_coding	0.0275212	2801	1	9	0.111111	8	0.125	2588	hsa-miR-874-3p
hsa_circRNA_103573	hsa_circ_0002319	circRNA	NM_174898	LYG1	protein_coding	0.0309136	3133	1	9	0.111111	9	0.111111	2588	hsa-miR-485-5p
hsa_circRNA_103573	hsa_circ_0002319	circRNA	UC011DPE.2	C4B_2	protein_coding	0.0275212	2804	1	9	0.111111	8	0.125	2588	hsa-miR-874-3p
hsa_circRNA_103573	hsa_circ_0002319	circRNA	NM_030573	THAP7	protein_coding	0.00178331	364	2	9	0.222222	19	0.105263	2588	hsa-miR-766-5p,hsa-miR-485-5p
hsa_circRNA_103573	hsa_circ_0002319	circRNA	NM_005645	TAF13	protein_coding	0.0275212	2808	1	9	0.111111	8	0.125	2588	hsa-miR-29b-2-5p
hsa_circRNA_103573	hsa_circ_0002319	circRNA	ENST00000368376	MTX1	protein_coding	0.0275212	2809	1	9	0.111111	8	0.125	2588	hsa-miR-518c-5p
hsa_circRNA_103573	hsa_circ_0002319	circRNA	NM_138414	CCDC101	protein_coding	0.0104005	1366	1	9	0.111111	3	0.333333	2588	hsa-miR-874-3p
hsa_circRNA_103573	hsa_circ_0002319	circRNA	UC001YSK.1	FLJ00382	protein_coding	0.0104005	1370	1	9	0.111111	3	0.333333	2588	hsa-miR-558
hsa_circRNA_103573	hsa_circ_0002319	circRNA	NM_001639	APCS	protein_coding	0.0342954	3432	1	9	0.111111	10	0.1	2588	hsa-miR-558
hsa_circRNA_103573	hsa_circ_0002319	circRNA	NM_033208	TIGD7	protein_coding	0.0241183	2511	1	9	0.111111	7	0.142857	2588	hsa-miR-223-3p
hsa_circRNA_103573	hsa_circ_0002319	circRNA	NM_013263	BRD7	protein_coding	0.0309136	3145	1	9	0.111111	9	0.111111	2588	hsa-miR-518c-5p
hsa_circRNA_103573	hsa_circ_0002319	circRNA	NM_016459	MZB1	protein_coding	0.00197787	396	2	9	0.222222	20	0.1	2588	hsa-miR-18a-3p,hsa-miR-485-5p
hsa_circRNA_103573	hsa_circ_0002319	circRNA	NM_004049	BCL2A1	protein_coding	0.0309136	3147	1	9	0.111111	9	0.111111	2588	hsa-miR-518c-5p
hsa_circRNA_103573	hsa_circ_0002319	circRNA	NM_032579	RETNLB	protein_coding	0.0309136	3148	1	9	0.111111	9	0.111111	2588	hsa-miR-29b-2-5p
hsa_circRNA_103573	hsa_circ_0002319	circRNA	NM_003446	ZNF157	protein_coding	0.0241183	2514	1	9	0.111111	7	0.142857	2588	hsa-miR-874-3p
hsa_circRNA_103573	hsa_circ_0002319	circRNA	NM_004881	TP53I3	protein_coding	0.000581933	159	2	9	0.222222	11	0.181818	2588	hsa-miR-518c-5p,hsa-miR-766-5p
hsa_circRNA_103573	hsa_circ_0002319	circRNA	NM_001010857	LELP1	protein_coding	0.00142344	320	2	9	0.222222	17	0.117647	2588	hsa-miR-29b-2-5p,hsa-miR-223-3p
hsa_circRNA_103573	hsa_circ_0002319	circRNA	NM_012274	HYPM	protein_coding	0.0241183	2515	1	9	0.111111	7	0.142857	2588	hsa-miR-874-3p
hsa_circRNA_103573	hsa_circ_0002319	circRNA	NM_006871	RIPK3	protein_coding	0.000697058	189	2	9	0.222222	12	0.166667	2588	hsa-miR-18a-3p,hsa-miR-223-3p
hsa_circRNA_103573	hsa_circ_0002319	circRNA	NM_001042367	REC114	protein_coding	0.00347759	617	1	9	0.111111	1	1	2588	hsa-miR-766-5p
hsa_circRNA_103573	hsa_circ_0002319	circRNA	NM_001008749	RAB19	protein_coding	0.0207048	2208	1	9	0.111111	6	0.166667	2588	hsa-miR-29b-2-5p
hsa_circRNA_103573	hsa_circ_0002319	circRNA	NM_001136152	ALG1L2	protein_coding	0.0138459	1642	1	9	0.111111	4	0.25	2588	hsa-miR-558
hsa_circRNA_103573	hsa_circ_0002319	circRNA	NM_014260	PFDN6	protein_coding	0.00694442	1055	1	9	0.111111	2	0.5	2588	hsa-miR-558
hsa_circRNA_103573	hsa_circ_0002319	circRNA	ENST00000560581	C15orf60	protein_coding	0.00347759	618	1	9	0.111111	1	1	2588	hsa-miR-766-5p
hsa_circRNA_103573	hsa_circ_0002319	circRNA	NM_015908	SRRT	protein_coding	0.0172807	1925	1	9	0.111111	5	0.2	2588	hsa-miR-624-3p
hsa_circRNA_103573	hsa_circ_0002319	circRNA	NM_001001663	TMEM211	protein_coding	0.0207048	2212	1	9	0.111111	6	0.166667	2588	hsa-miR-518c-5p
hsa_circRNA_103573	hsa_circ_0002319	circRNA	NM_001252204	C4A	protein_coding	0.0275212	2824	1	9	0.111111	8	0.125	2588	hsa-miR-874-3p
hsa_circRNA_103573	hsa_circ_0002319	circRNA	NM_080653	ATP6V1E2	protein_coding	0.0342954	3449	1	9	0.111111	10	0.1	2588	hsa-miR-766-5p
hsa_circRNA_103573	hsa_circ_0002319	circRNA	NM_001100879	ST20	protein_coding	0.0138459	1643	1	9	0.111111	4	0.25	2588	hsa-miR-518c-5p
hsa_circRNA_103573	hsa_circ_0002319	circRNA	NM_022168	IFIH1	protein_coding	0.0172807	1931	1	9	0.111111	5	0.2	2588	hsa-miR-223-3p
hsa_circRNA_103573	hsa_circ_0002319	circRNA	NM_033284	TBL1Y	protein_coding	0.00178331	366	2	9	0.222222	19	0.105263	2588	hsa-miR-29b-2-5p,hsa-miR-558
hsa_circRNA_103573	hsa_circ_0002319	circRNA	NM_001044264	MSMP	protein_coding	0.0275212	2829	1	9	0.111111	8	0.125	2588	hsa-miR-29b-2-5p
hsa_circRNA_103573	hsa_circ_0002319	circRNA	NM_001102564	IFT43	protein_coding	0.0241183	2522	1	9	0.111111	7	0.142857	2588	hsa-miR-558
hsa_circRNA_103573	hsa_circ_0002319	circRNA	ENST00000512516	RP11-487E13.1	protein_coding	0.0309136	3155	1	9	0.111111	9	0.111111	2588	hsa-miR-766-5p
hsa_circRNA_103573	hsa_circ_0002319	circRNA	NM_173811	HARBI1	protein_coding	0.00197787	397	2	9	0.222222	20	0.1	2588	hsa-miR-766-5p,hsa-miR-223-3p
hsa_circRNA_103573	hsa_circ_0002319	circRNA	UC001XBD.1	AK096898	protein_coding	0.00178331	368	2	9	0.222222	19	0.105263	2588	hsa-miR-29b-2-5p,hsa-miR-485-5p
hsa_circRNA_103573	hsa_circ_0002319	circRNA	NM_001001973	ATP5C1	protein_coding	0.0207048	2220	1	9	0.111111	6	0.166667	2588	hsa-miR-766-5p
hsa_circRNA_103573	hsa_circ_0002319	circRNA	NM_015363	ZIM2	protein_coding	0.000822309	231	2	9	0.222222	13	0.153846	2588	hsa-miR-624-3p,hsa-miR-766-5p
hsa_circRNA_103573	hsa_circ_0002319	circRNA	NM_005125	CCS	protein_coding	3.75189e-05	29	3	9	0.333333	21	0.142857	2588	hsa-miR-518c-5p,hsa-miR-18a-3p,hsa-miR-874-3p
hsa_circRNA_103573	hsa_circ_0002319	circRNA	NM_002370	MAGOH	protein_coding	0.000476988	148	2	9	0.222222	10	0.2	2588	hsa-miR-18a-3p,hsa-miR-874-3p
hsa_circRNA_103573	hsa_circ_0002319	circRNA	NM_017806	LIME1	protein_coding	0.0275212	2837	1	9	0.111111	8	0.125	2588	hsa-miR-518c-5p
hsa_circRNA_103573	hsa_circ_0002319	circRNA	NM_153741	DPM3	protein_coding	0.0275212	2839	1	9	0.111111	8	0.125	2588	hsa-miR-766-5p
#
